# Supplementary material for: A Novel Bio-Purification Process Employing an Engineered E. coli Strain for Downstream Processing of Lactic Acid Solutions from the Fermentation of Agro-Industrial by-Products
Source: MDPI journal article supplement (doi:10.3390/bioengineering11050412), 2024-04-23
Supplement: s1 [file s1]

# A Novel Bio-Purification Process Employing an Engineered *E. coli* Strain for Downstream Processing of Lactic Acid Solutions from the Fermentation of Agro-Industrial by-Products

Alexandra Nastouli <sup>1,2</sup>, Alexandra Moschona <sup>1</sup>, Panagiotis A. Bizirtsakis <sup>1</sup>, Joseph Sweeney <sup>3</sup>, Irini Angelidaki <sup>4</sup>, Michael Harasek <sup>2</sup>, Anastasios J. Karabelas <sup>1</sup> and Sotiris I. Patsios <sup>1,\*</sup>

<sup>1</sup> Laboratory of Natural Resources and Renewable Energies, Chemical Process & Energy Resources Institute (CPERI), Centre for Research and Technology-Hellas (CERTH), GR 57001 Thessaloniki, Greece;

a.nastouli@certh.gr (A.N.); alexmoschona@certh.gr (A.M.); pbizirtsakis@certh.gr (P.A.B.); karabaj@certh.gr (A.J.K.)

<sup>2</sup> Institute of Chemical, Environmental and Bioscience Engineering, TU Wien, AU 1040 Vienna, Austria; michael.harasek@tuwien.ac.at

<sup>3</sup> School of Biosystems and Food Engineering, University College Dublin (UCD), D04 V1W8 Belfield, Dublin, Ireland; joseph.sweeney@ucd.ie

<sup>4</sup> Department of Chemical and Biochemical Engineering, Technical University of Denmark, DK-2800 Kongens Lyngby, Denmark; iria@kt.dtu.dk

\* Correspondence: patsios@certh.gr; Tel.: +30-23-1049-8183

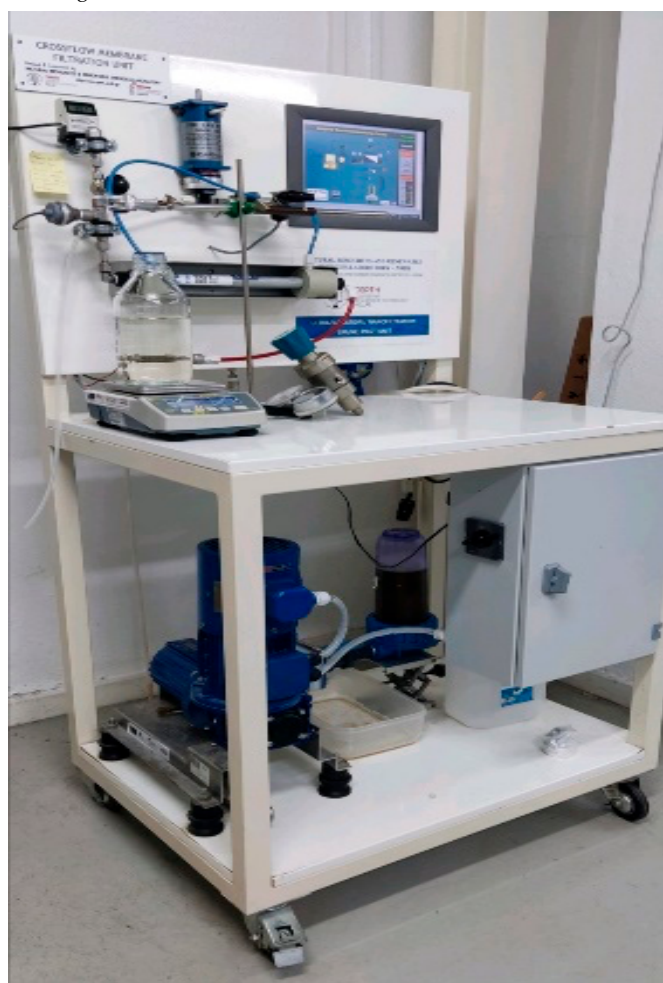

**Figure S1.** A photo of the nanofiltration (NF) unit used in this study.

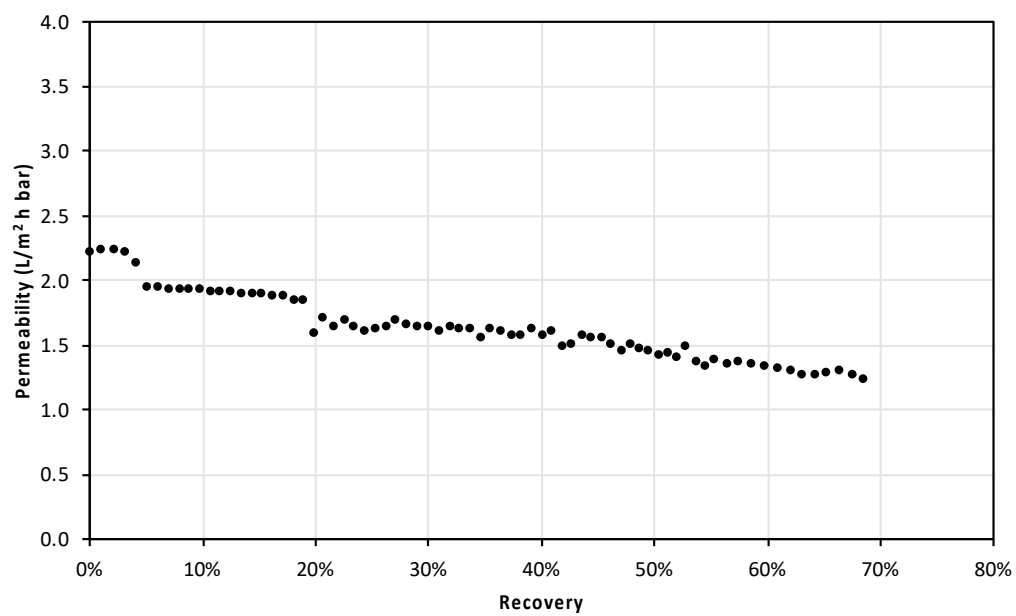

**Figure S2.** Permeability vs. permeate recovery during the NF test.

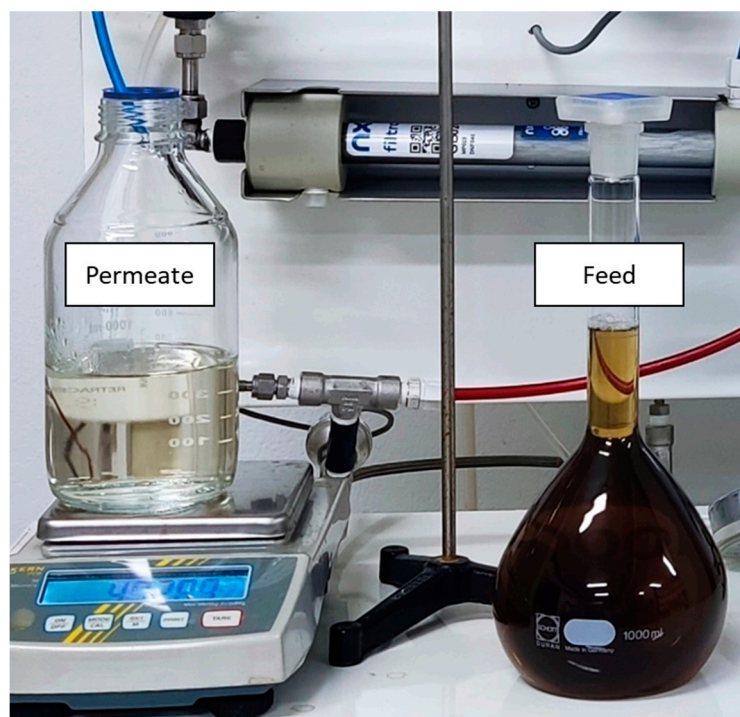

**Figure S3.** NF permeate and initial feedstock; an NF membrane process step was applied on the real feedstock.
